# Supplementary material
Source: PubMed Central journal article supplement (PMC6261453)
Supplement: NIHMS1509063-supplement-1.pdf [file NIHMS1509063-supplement-1.pdf]

# Supplementary Materials for

## A Call for an Aloft Air Quality Monitoring Network: Need and Feasibility

Rohit Mathur<sup>1</sup>, Christian Hogrefe<sup>1</sup>, Amir Hakami<sup>2</sup>, Shunliu Zhao<sup>2</sup>,  
James Szykman<sup>1</sup>, Gayle Hagler<sup>1</sup>

<sup>1</sup> National Exposure Research Laboratory, Office of Research and Development, U.S. Environmental Protection Agency, RTP, NC, USA

<sup>2</sup> Department of Civil and Environmental Engineering, Carleton University, Ottawa, Canada

*Correspondence to:* Rohit Mathur (mathur.rohit@epa.gov)

### Community Multiscale Air Quality (CMAQ) Model

CMAQ is a comprehensive air pollution modeling system that simulates air quality on scales ranging from urban to hemispheric. The model includes detailed representation of processes (emissions, atmospheric chemistry, transport, removal) regulating the fate of airborne pollutants. Information on the dynamical state of the atmosphere is typically derived from simulations of the Weather Research and Forecast (WRF) meteorological model. The model code, documentation, and extensive peer-reviewed literature on model processes, algorithms, applications, and evaluation are publicly available at: <https://www.epa.gov/cmaq>. The modeling system is widely used for air pollution research and regulatory applications across the world.

### CMAQ-Adjoint

A comparative analysis of the influence of ozone concentrations at the surface and aloft on  $\text{DM8O}_3$  is conducted using an adjoint version of the CMAQ model (23). An adjoint model solves an auxiliary set of sensitivity equations that mimic and are linked to the model's governing equations. Unlike the base CMAQ model, the adjoint equations are integrated backward in time, and in doing so they trace influences on a scalar concentration function (often referred to as the adjoint cost or objective function) back to concentrations and sources at preceding model time steps. Backward integration of adjoint equations follows a forward simulation of the CMAQ model during which the required concentrations and model variables at all time steps are saved for use in the adjoint simulation. The advantage of the adjoint sensitivities calculated in this

30 manner is in their ability to provide time- and location-specific measures of influence on the  
31 objective function.

32  
33 To quantify how surface or aloft concentrations of ozone affect surface DM8O<sub>3</sub>, the adjoint  
34 objective function is defined as the cumulative DM8O<sub>3</sub> over a region – depicted by the inner box  
35 within the computational domain for these calculations (depicted in Figure S1), for days on  
36 which the DM8O<sub>3</sub> value exceeds a 70 ppb threshold. A 20-cell margin from the boundary (the  
37 inner box in Figure S1) is considered as the target area for this analysis to avoid influences from  
38 the lateral boundaries and to better characterize in-domain influences. The calculation of adjoint  
39 sensitivities are initially forced at the times and locations where the objective function  
40 materializes, in this case hours and cells that comprise MD8O<sub>3</sub> exceedances over the target area.  
41 The adjoint “forcing” at each location and time then corresponds to the instantaneous sensitivity  
42 of the objective function to ozone concentration at that location and time. This “forcing” can be  
43 considered analogous to emissions for the forward model, since it acts as the “source” of  
44 influences that drive the adjoint simulations. These influences are then integrated backward in  
45 time through the adjoint system of equations to preceding times and for various modeled  
46 processes (transport, chemistry, deposition, etc) at each time step.

47  
48 With this definition of the adjoint objective function, the values at each location in Figure 4  
49 should be interpreted as the total DM8O<sub>3</sub> contributions in ppb (for MD8O<sub>3</sub> > 70 ppb) in the  
50 target area for any ppb ozone at that location. As such, these values can be taken as a measure of  
51 information that ozone observations at various altitudes and locations may carry with regards to  
52 characterization of surface-level ozone. Note that calculated adjoint contributions to surface  
53 MD8O<sub>3</sub> concentrations extend beyond the inner box in Figure S1, as concentrations in these  
54 upwind locations influence surface concentrations over the target area. Similar adjoint analysis  
55 performed to estimate the added value of potential aloft NO<sub>x</sub> measurements (Figure S2) also  
56 suggest significantly larger contributions from aloft NO<sub>x</sub> levels to regulating DM8O<sub>3</sub>, than  
57 surface values. These results suggest that aloft NO<sub>x</sub>, either transported from elevated sources, or  
58 recycled from reservoir species is also influential in regulating surface DM8O<sub>3</sub> especially in  
59 regions away from major NO<sub>x</sub> emissions. The lower DM8O<sub>3</sub> sensitivity to surface NO<sub>x</sub>

60 concentrations arises from  $O_3$  destruction from reactions with NO in vicinity of the  $NO_x$   
61 emission sources.

62  
63 CMAQ-Adjoint was used to simulate air quality and the backward sensitivities described above,  
64 over a domain covering the southeastern U.S. (depicted in Figures 4 and S1) discretized with a  
65 horizontal grid of 12km resolution, for the July 1-14, 2011 period. The adjoint version of CMAQ  
66 used here includes all gas-phase chemistry, transport, removal processes relevant for  
67 representing tropospheric  $O_3$ . The adjoint is based on CMAQv4.5  
68 (<https://www.epa.gov/cmaq/cmaq-models-0>). Gas-phase chemistry is represented using the  
69 Carbon Bond 5 (CB05) chemical mechanism which includes 187 chemical reactions amongst 72  
70 gaseous species (5). The vertical extent from the surface to 50hPa was discretized with 35 layers  
71 of variable thickness. Meteorological fields were derived from simulations with the Weather  
72 Research and Forecast (WRF) model, while anthropogenic emissions of various species were  
73 based on the 2011 National Emissions Inventory (NEI). 3-D chemical initial fields and boundary  
74 conditions were derived from previously conducted CMAQ simulations over a larger continental  
75 domain which have been extensively evaluated against a variety of surface and aloft  
76 measurements (5). This CMAQ-adjoint model configuration, domain size and discretization, and  
77 simulation duration enable an appropriate attribution of the backward sensitivities of surface-  
78 level  $DM8O_3$  to  $O_3$  and precursor levels at various altitudes

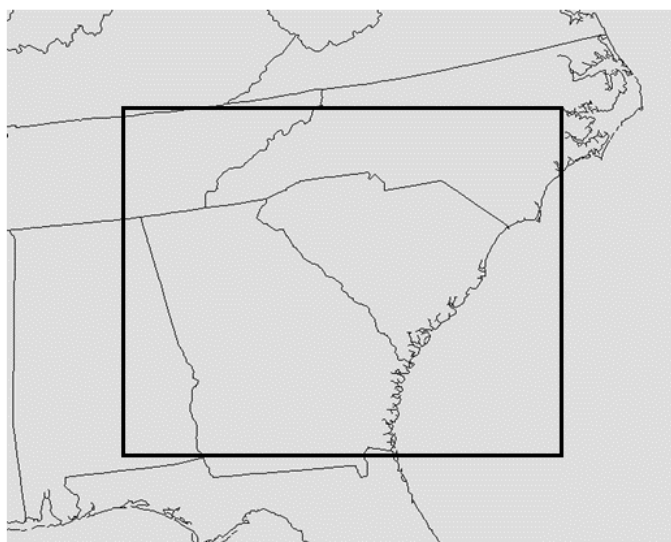

79

80 **Figure S1:** The computational domain for the CMAQ-adjoint simulations. The inner box is the target area over  
81 which the adjoint objective function is defined.

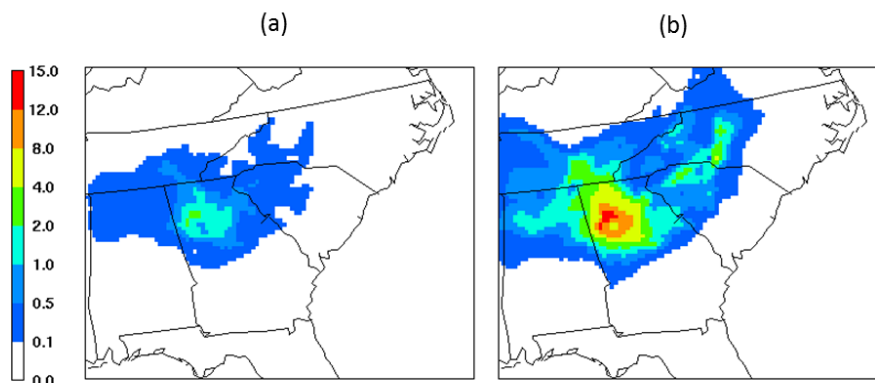

82  
83 **Figure S2:** Adjoint sensitivity of surface-level daily maximum 8-hour average  $O_3 > 70$  ppb (DM8O<sub>3</sub>) to NO mixing  
84 ratios at different altitudes across the southeastern U.S. during 1-14 July, 2011. Estimated change in simulated  
85 DM8O<sub>3</sub> (in ppb) due to (a) a 1 ppb change in representation of NO at the surface (0-20m) and (b) a 1 ppb change in  
86 representation of NO at 400-500m altitude. Improvements in characterization of NO<sub>x</sub> mixing ratios aloft would also  
87 yield improved predictive capabilities for DM8O<sub>3</sub>. NO<sub>x</sub> aloft, either transported from elevated sources or recycled  
88 from reservoir species (such as organic nitrates) is also influential in regulating surface DM8O<sub>3</sub> in regions away  
89 from major surface-level NO<sub>x</sub> sources. Thus as measurement accuracy of compact, low-cost NO<sub>x</sub> sensor is  
90 improved, the proposed aloft network could be enhanced to also provide aloft NO<sub>x</sub> measurements to improve surface  
91 O<sub>3</sub> predictions.

92
